# Supplementary figures and images for: EBP50 Depletion and Nuclear β-Catenin Accumulation Engender Aggressive Behavior of Colorectal Carcinoma through Induction of Tumor Budding
Source: MDPI journal article supplement (doi:10.3390/cancers16010183), 2023-12-29

Figure 3C

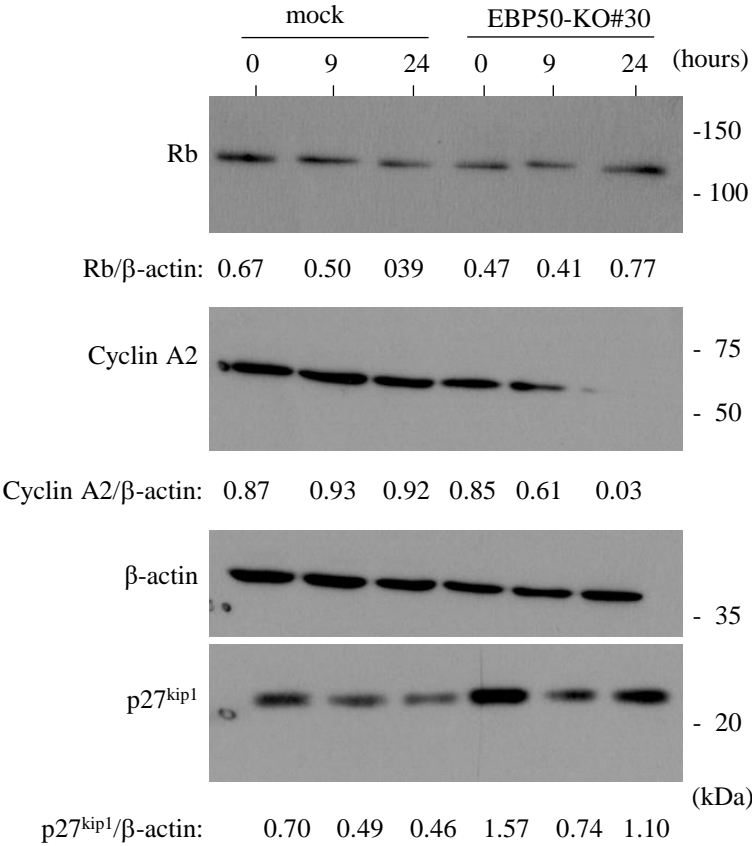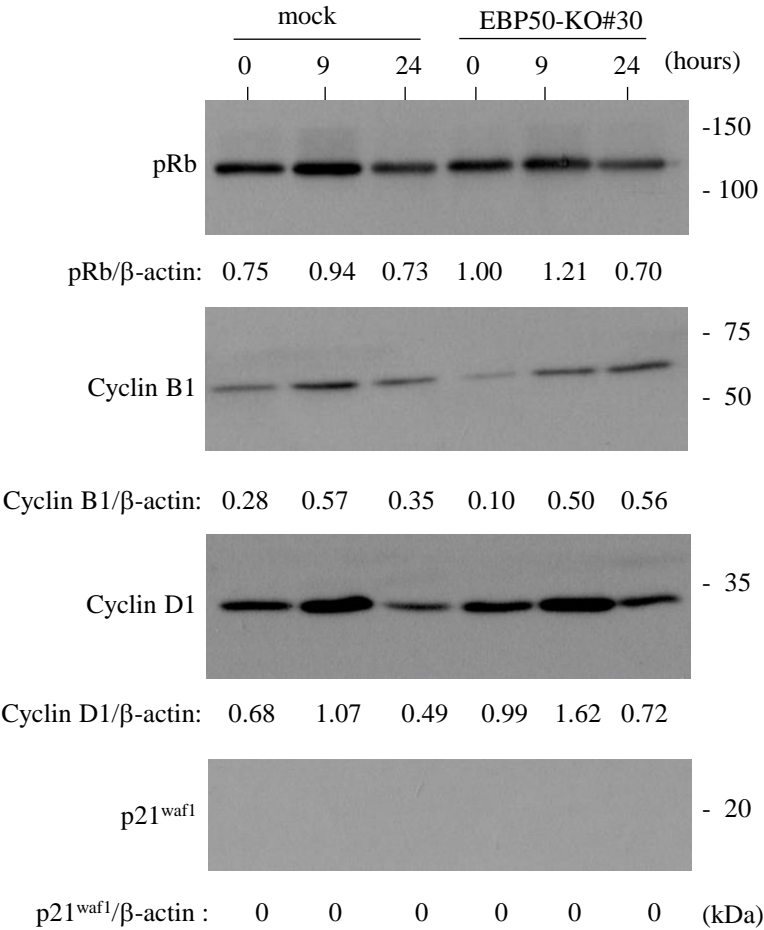

Figure 4C

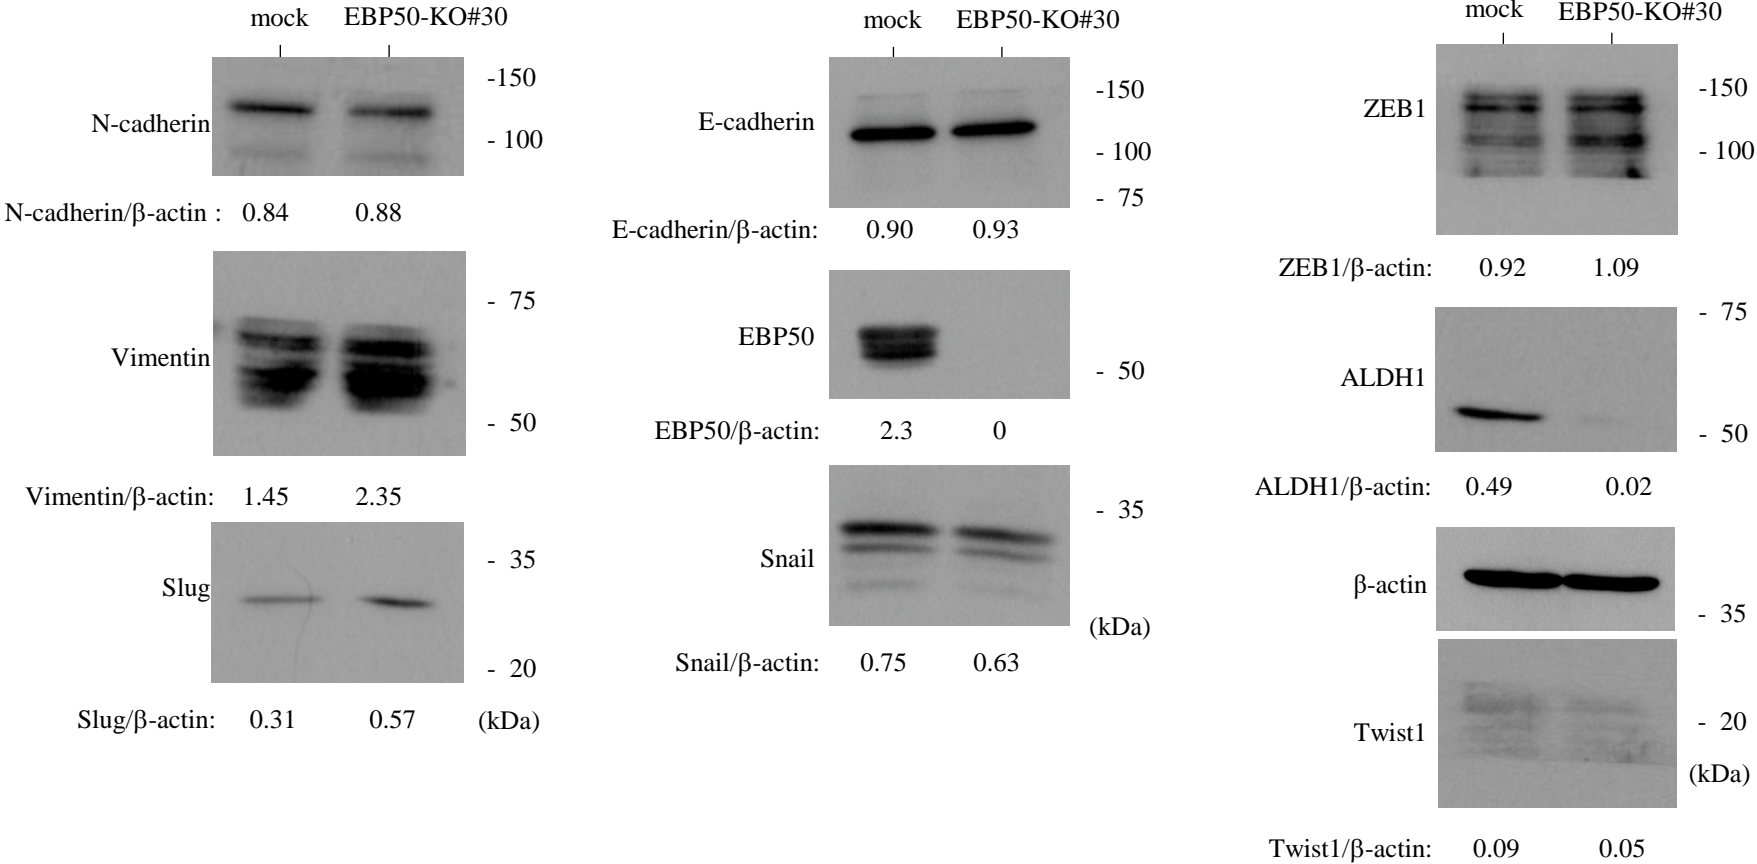

Figure 5A

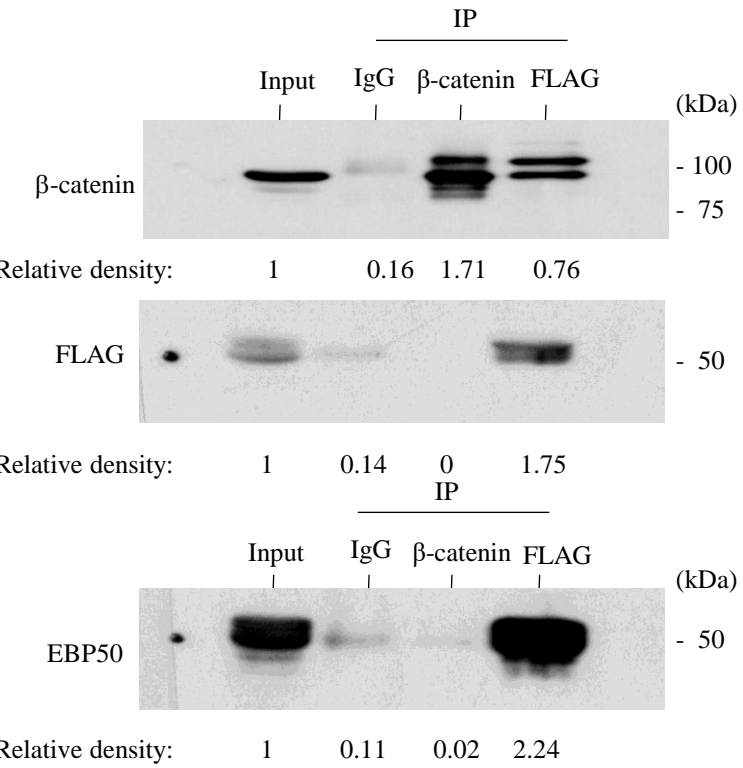

Figure 5C

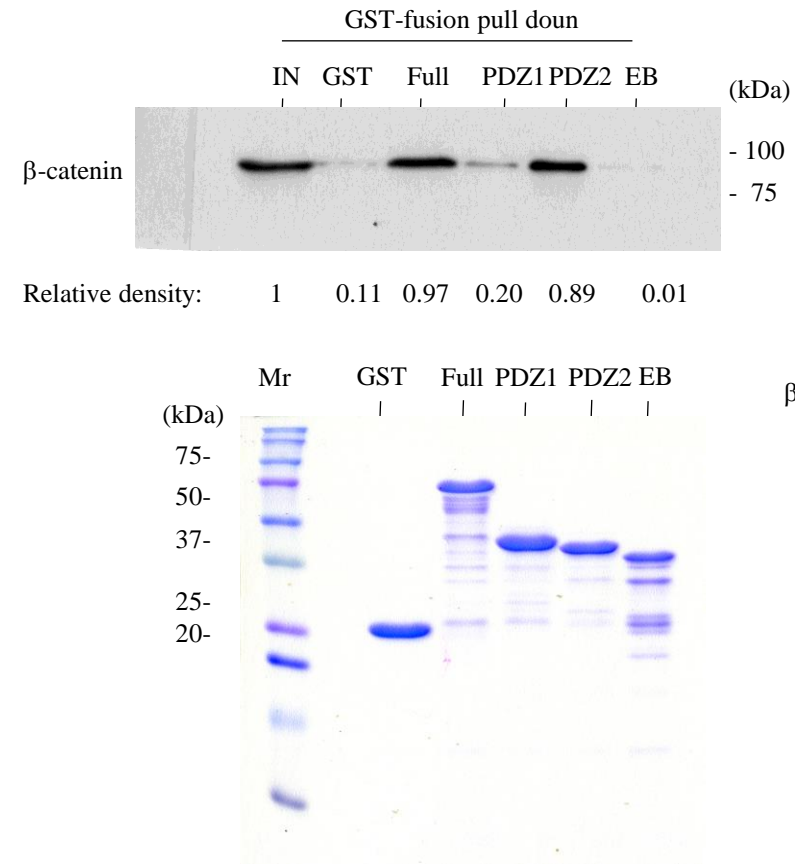

Figure 5F

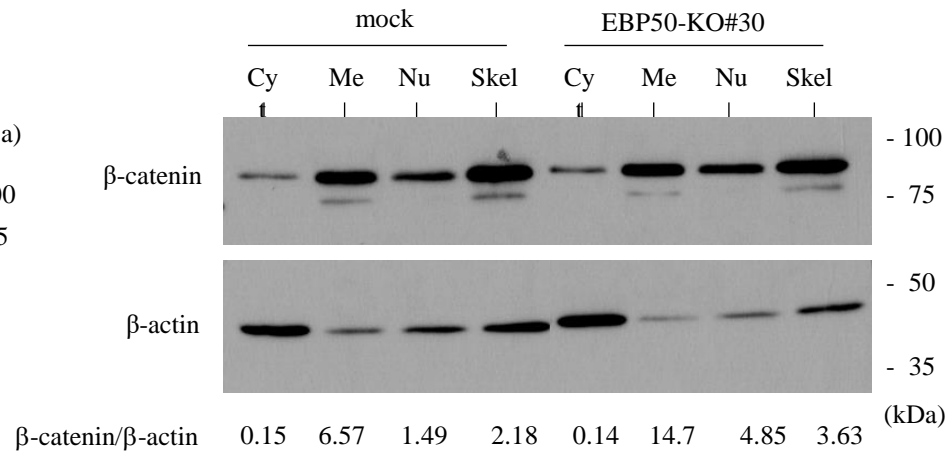

Supplementary Figure S3

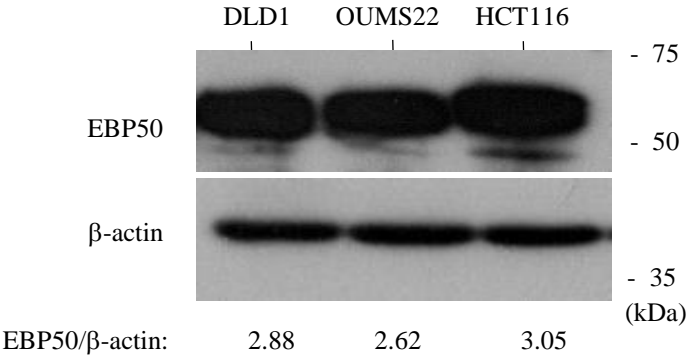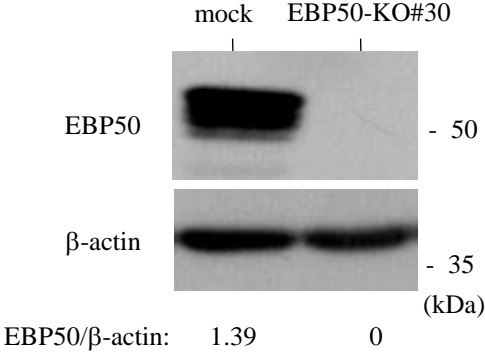

Supplement: s1 [file s1]
